# Supplementary material
Source: PubMed Central journal article supplement (PMC3321547)

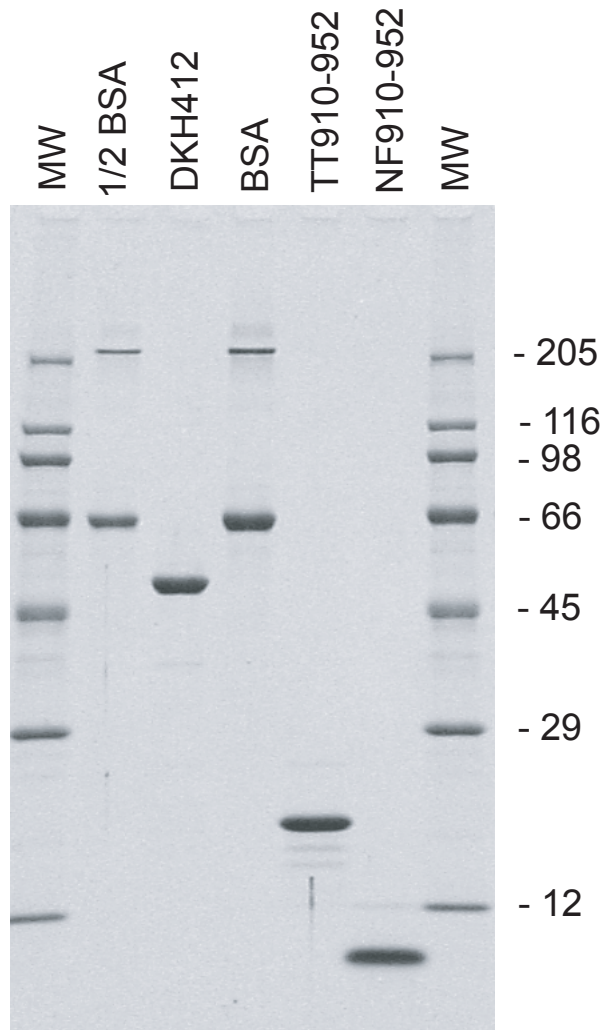

Supplement: NIHMS105176-supplement-2_si_002.pdf [file NIHMS105176-supplement-2_si_002.pdf]
